# Supplementary material for: Tuning the Transdermal Delivery of Hydroquinone upon Formulation with Novel Permeation Enhancers
Source: PubMed Central journal article supplement (PMC6523612; doi:10.3390/pharmaceutics11040167), 2019-04-04
Supplement: pharmaceutics-11-00167-s001.pdf [file pharmaceutics-11-00167-s001.pdf]

# Supplementary Materials: Tuning the Transdermal Delivery of Hydroquinone upon Formulation with Novel Permeation Enhancers

Dolores R. Serrano, María José Gordo, Antonio Matji, Salvador González, Aikaterini Lalatsa and Juan José Torrado

**Table S1.** Virgin olive oil characteristics. All physicochemical tests were conformed with Pharmacopeia requirements.

| Test                             | Result                     | Limit         |
|----------------------------------|----------------------------|---------------|
| Acidity                          | 0.1 %                      | ≤ 0.8         |
| Peroxide index                   | 5.8 meq O <sub>2</sub> /kg | ≤ 20          |
| Humidity and volatile substances | 0.09 %                     | ≤ 0.2         |
| Insoluble impurities             | < 0.05 %                   | ≤ 0.1         |
| Refractive index                 | 1.468                      | 1.4677–1.4705 |
| Ethyl esters                     | < 10                       | Max 35        |
| Content of total sterols         | 1347 mg/kg                 | ≥ 1000        |
| Cholesterol                      | 0.1 %                      | ≤ 0.5         |
| Miristic acid (C14:0)            | < 0.01 %                   | ≤ 0.03        |

**Table S2.** Nourivan® characteristics. Composition: Purified water, cetearyl alcohol, polysorbate 60, C13-C16 isoparaffin, C12-C14 isoparaffin, C13-C15 alkane, glyceryl stearate, polyacrylate 13, polyisobutene, polysorbate 20, polyurethane-39, stearyl behenate, cetyl alcohol, ascorbic acid, benzoic acid, sodium bisulfite, sorbic acid, tocopheryl acetate.

| Test                                   | Result       | Specifications            |
|----------------------------------------|--------------|---------------------------|
| Identification                         | Conform      | Method A, B (A0133720-28) |
| Relative density                       | 0.98 g/ml    | 0.97-1 g/ml               |
| pH                                     | 3.5          | 3.5 - 5.5                 |
| Viscosity                              | 172400 mPa s | 100000 – 350000 mPa s     |
| Benzoic acid                           | 0.096 %      | 0.06- 0.12 %              |
| Sorbic acid                            | 0.09 %       | 0.06- 0.12 %              |
| Total content of aerobic microorganism | < 10 CFU/g   | < 1000 CFU/g              |
| Total content of fungi and yeast       | < 10CFU/g    | < 100 CFU/g               |
| <i>Staphylococcus aureus</i>           | Conform      | Absence                   |
| <i>Pseudomona aeruginosa</i>           | Conform      | Absence                   |
